# Supplementary material for: Validating a Short Version of the External Food Cue Responsiveness Scale (EFCR-6) in Preadolescents: Initial Evidence on Validity and Reliability
Source: Research Square preprint supplement (doi:10.21203/rs.3.rs-5976498/v1), 2025-12-16
Supplement: Supplementary file 1 [file debecf2f21c8a4d86a32cbab.pdf]

**Table S1.** Psychometric properties and item loadings of the original nine-item External Food Cue Responsiveness scale (EFCR) in preadolescents (N=185).

|                                                                 |                              |
|-----------------------------------------------------------------|------------------------------|
| EFCR score (mean $\pm$ SD)                                      | 1.87 $\pm$ 0.48              |
| <b>Fit measure</b>                                              |                              |
| Chi-squared test statistics (degree of freedom)                 | 402.5 (36)                   |
| <i>P</i> -value from Chi-squared test                           | <0.01                        |
| CFI                                                             | 0.81                         |
| TLI                                                             | 0.74                         |
| RMSEA                                                           | 0.12                         |
| SRMR                                                            | 0.08                         |
| <b>Internal consistency</b>                                     |                              |
| Cronbach's $\alpha$                                             | 0.78                         |
| McDonald's $\omega$                                             | 0.78                         |
| <b>Item</b>                                                     | <b>Standardized loadings</b> |
| Q1. My child wants snacks at check-out aisles.                  | 0.50                         |
| Q2. My child likes certain snacks because of the packaging.     | 0.48                         |
| Q3. My child points out snack or drink vending machines.        | 0.54                         |
| Q4. My child asks for foods or drinks that other kids eat.      | 0.27                         |
| Q5. My child gets excited by the sound of food cooking.         | 0.37                         |
| Q6. My child wants to eat if he/she hears a snack being opened. | 0.46                         |
| Q7. My child wants to eat when people talk about food.          | 0.44                         |
| Q8. My child gets excited when he/she sees restaurant logos.    | 0.46                         |
| Q9. My child expects a snack when in the car.                   | 0.31                         |
| <b>One-year test-retest reliability (ICC, N = 96)</b>           | 0.76                         |

*Note:* CFI, comparative fit index. TLI, Tucker-Lewis index. RMSEA, root mean square error of approximation. SRMR, standardized root mean square residual. ICC, intraclass correlation derived from a two-way consistency model. This table presents fit measures and item loadings from a confirmatory factor analysis on the one-factor structure of the original External Food Cue Responsiveness scale (9 items, range 1 to 4).

**Table S2.** Internal consistency of questionnaires.

| <b>Instrument</b> | <b>Subscale</b>                  | <b>Number of Items</b> | <b>N</b> | <b>Cronbach's <math>\alpha</math></b> | <b>McDonald's <math>\omega</math></b> |
|-------------------|----------------------------------|------------------------|----------|---------------------------------------|---------------------------------------|
| EFCR              | Overall                          | 9                      | 185      | 0.78                                  | 0.78                                  |
| EFCR-6            | Overall                          | 6                      | 185      | 0.73                                  | 0.73                                  |
| EFCR-6            | Auditory food cue responsiveness | 3                      | 185      | 0.70                                  | 0.70                                  |
| EFCR-6            | Visual food cue responsiveness   | 3                      | 185      | 0.74                                  | 0.74                                  |
| CEBQ              | Food responsiveness              | 5                      | 185      | 0.83                                  | 0.84                                  |
| CEBQ              | Emotional overeating             | 4                      | 185      | 0.82                                  | 0.83                                  |
| CEBQ              | Enjoyment of food                | 4                      | 185      | 0.82                                  | 0.83                                  |
| I <sup>6</sup>    | Overall                          | 23                     | 184      | 0.81                                  | 0.81                                  |
| CHAOS             | Overall                          | 15                     | 184      | 0.87                                  | 0.87                                  |
| CFPQ              | Restriction for weight control   | 8                      | 185      | 0.82                                  | 0.83                                  |
| CFPQ              | Using food as a reward           | 2                      | 185      | 0.81                                  | 0.81                                  |
| API               | Demanding parenting              | 4                      | 185      | 0.52                                  | 0.53                                  |
| API               | Responsive parenting             | 5                      | 185      | 0.75                                  | 0.75                                  |

*Notes:* EFCR, the original External Food Cue Responsiveness Scale. EFCR-6, the six-item External Food Cue Responsiveness scale. CEBQ, Child Eating Behavior Questionnaire. I<sup>6</sup>, Eysenck's Impulsiveness Questionnaire. CHAOS, Confusion, Hubbub, and Order Scale. CFPQ, Comprehensive Feeding Practices Questionnaire. API, Authoritative Parenting Index.

**Table S3.** Exploratory factor analysis on the two-factor solution (N = 185).

| Item                                                            | Standardized loadings |                     |
|-----------------------------------------------------------------|-----------------------|---------------------|
|                                                                 | <i>Factor 1</i>       | <i>Factor 2</i>     |
| Q1. My child wants snacks at check-out aisles.                  | 0.849*                |                     |
| Q2. My child likes certain snacks because of the packaging.     | 0.634*                | 0.137 <sup>a</sup>  |
| Q3. My child points out snack or drink vending machines.        | 0.579*                |                     |
| Q4. My child asks for foods or drinks that other kids eat.      | 0.317* <sup>a</sup>   | 0.101 <sup>a</sup>  |
| Q5. My child gets excited by the sound of food cooking.         | -0.138* <sup>a</sup>  | 0.697*              |
| Q6. My child wants to eat if he/she hears a snack being opened. |                       | 0.675*              |
| Q7. My child wants to eat when people talk about food.          |                       | 0.613*              |
| Q8. My child gets excited when he/she sees restaurant logos.    | 0.198* <sup>a</sup>   | 0.551* <sup>b</sup> |
| Q9. My child expects a snack when in the car.                   | 0.125 <sup>a</sup>    | 0.302* <sup>a</sup> |

Note: \*  $p < 0.01$ .

<sup>a</sup>Items with loadings  $< 0.4$  were removed from the factor.

<sup>b</sup>Q8 is a visual cue-related item and was removed from factor 2, as this domain primarily reflects responsiveness to sound-related food cues.

This table presents the standardized item loadings from an exploratory factor analysis with oblique rotation.

**Table S4.** The distribution of the six-item External Food Cue Responsiveness scale scores by demographics.

|                                                                                                                                                                                                                                                                                                                                                                                                                                                                                                                                                                                                                                                                                                                                                                                                                                                     | Mean $\pm$ SD or N (%) | EFCR-6 score, Mean $\pm$ SD | <i>P</i> -value |
|-----------------------------------------------------------------------------------------------------------------------------------------------------------------------------------------------------------------------------------------------------------------------------------------------------------------------------------------------------------------------------------------------------------------------------------------------------------------------------------------------------------------------------------------------------------------------------------------------------------------------------------------------------------------------------------------------------------------------------------------------------------------------------------------------------------------------------------------------------|------------------------|-----------------------------|-----------------|
| <b>Child age (years)</b>                                                                                                                                                                                                                                                                                                                                                                                                                                                                                                                                                                                                                                                                                                                                                                                                                            | 1.9 $\pm$ 1.2          |                             | 0.10            |
| <b>Child sex (N=184)</b>                                                                                                                                                                                                                                                                                                                                                                                                                                                                                                                                                                                                                                                                                                                                                                                                                            |                        |                             | 0.96            |
| Male                                                                                                                                                                                                                                                                                                                                                                                                                                                                                                                                                                                                                                                                                                                                                                                                                                                | 107 (58%)              | 1.90 $\pm$ 0.54             |                 |
| Female                                                                                                                                                                                                                                                                                                                                                                                                                                                                                                                                                                                                                                                                                                                                                                                                                                              | 77 (42%)               | 1.90 $\pm$ 0.55             |                 |
| <b>Child race/ethnicity</b>                                                                                                                                                                                                                                                                                                                                                                                                                                                                                                                                                                                                                                                                                                                                                                                                                         |                        |                             | 0.47            |
| White, non-Hispanic                                                                                                                                                                                                                                                                                                                                                                                                                                                                                                                                                                                                                                                                                                                                                                                                                                 | 167 (91%)              | 1.91 $\pm$ 0.54             |                 |
| Others                                                                                                                                                                                                                                                                                                                                                                                                                                                                                                                                                                                                                                                                                                                                                                                                                                              | 18 (10%)               | 1.81 $\pm$ 0.50             |                 |
| <b>Child weight status</b>                                                                                                                                                                                                                                                                                                                                                                                                                                                                                                                                                                                                                                                                                                                                                                                                                          |                        |                             | 0.12            |
| Underweight                                                                                                                                                                                                                                                                                                                                                                                                                                                                                                                                                                                                                                                                                                                                                                                                                                         | 2 (1%)                 | 2.08 $\pm$ 1.30             |                 |
| Healthy weight                                                                                                                                                                                                                                                                                                                                                                                                                                                                                                                                                                                                                                                                                                                                                                                                                                      | 126 (68%)              | 1.86 $\pm$ 0.50             |                 |
| Overweight                                                                                                                                                                                                                                                                                                                                                                                                                                                                                                                                                                                                                                                                                                                                                                                                                                          | 27 (15%)               | 1.94 $\pm$ 0.68             |                 |
| Obesity                                                                                                                                                                                                                                                                                                                                                                                                                                                                                                                                                                                                                                                                                                                                                                                                                                             | 30 (16%)               | 2.01 $\pm$ 0.54             |                 |
| <b>Household annual income (\$)</b>                                                                                                                                                                                                                                                                                                                                                                                                                                                                                                                                                                                                                                                                                                                                                                                                                 |                        |                             | 0.65            |
| <65,000                                                                                                                                                                                                                                                                                                                                                                                                                                                                                                                                                                                                                                                                                                                                                                                                                                             | 24 (13%)               | 1.78 $\pm$ 0.48             |                 |
| 65,000-145,000                                                                                                                                                                                                                                                                                                                                                                                                                                                                                                                                                                                                                                                                                                                                                                                                                                      | 99 (56%)               | 1.91 $\pm$ 0.51             |                 |
| 145,000-225,000                                                                                                                                                                                                                                                                                                                                                                                                                                                                                                                                                                                                                                                                                                                                                                                                                                     | 44 (24%)               | 1.98 $\pm$ 0.69             |                 |
| Over 225,000                                                                                                                                                                                                                                                                                                                                                                                                                                                                                                                                                                                                                                                                                                                                                                                                                                        | 18 (10%)               | 1.78 $\pm$ 0.28             |                 |
| <b>Parental education</b>                                                                                                                                                                                                                                                                                                                                                                                                                                                                                                                                                                                                                                                                                                                                                                                                                           |                        |                             | 0.97            |
| Without a bachelor's degree                                                                                                                                                                                                                                                                                                                                                                                                                                                                                                                                                                                                                                                                                                                                                                                                                         | 30 (16%)               | 1.83 $\pm$ 0.42             |                 |
| Bachelor's degree                                                                                                                                                                                                                                                                                                                                                                                                                                                                                                                                                                                                                                                                                                                                                                                                                                   | 51 (28%)               | 1.9 $\pm$ 0.57              |                 |
| Professional school or graduate school                                                                                                                                                                                                                                                                                                                                                                                                                                                                                                                                                                                                                                                                                                                                                                                                              | 104 (56%)              | 1.92 $\pm$ 0.56             |                 |
| <b>Parenting style</b>                                                                                                                                                                                                                                                                                                                                                                                                                                                                                                                                                                                                                                                                                                                                                                                                                              |                        |                             | 0.01            |
| Authoritative                                                                                                                                                                                                                                                                                                                                                                                                                                                                                                                                                                                                                                                                                                                                                                                                                                       | 50 (27%)               | 1.78 $\pm$ 0.53             |                 |
| Authoritarian                                                                                                                                                                                                                                                                                                                                                                                                                                                                                                                                                                                                                                                                                                                                                                                                                                       | 21 (11%)               | 1.91 $\pm$ 0.54             |                 |
| Permissive                                                                                                                                                                                                                                                                                                                                                                                                                                                                                                                                                                                                                                                                                                                                                                                                                                          | 41 (22%)               | 1.77 $\pm$ 0.48             |                 |
| Neglectful                                                                                                                                                                                                                                                                                                                                                                                                                                                                                                                                                                                                                                                                                                                                                                                                                                          | 73 (39%)               | 2.05 $\pm$ 0.55             |                 |
| <p><i>Note:</i> Child sex was not reported for one participant. Media use had one missing value and was imputed with the sample mean. Anthropometry was missing for one participant and was imputed with the sample mean. Household income had eight missing values and was imputed with the mode. Parental education had one missing value and was imputed with the mode (professional or graduate school). Parenting style was assessed via the Authoritative Parenting Index, a child-report instrument with two subscales: demandingness and responsiveness. We computed the <i>p</i>-values from Spearman's correlational test for continuous variables, the Wilcoxon rank sum test with continuity correction for categorical variables with two groups, and the Kruskal-Wallis test for categorical variables with more than two groups.</p> |                        |                             |                 |

**Table S5.** Standardized loadings of the six-item External Food Cue Responsiveness scale (EFCR-6) by child sex.

|                                                             | Overall<br>(N=185) | Males<br>(N=107) | Females<br>(N=77) |
|-------------------------------------------------------------|--------------------|------------------|-------------------|
| <b>Factor 1: visual food cue responsiveness</b>             |                    |                  |                   |
| My child wants snacks at check-out aisles.                  | 0.66               | 0.65             | 0.66              |
| My child likes certain snacks because of the packaging.     | 0.56               | 0.57             | 0.57              |
| My child points out snack or drink vending machines.        | 0.58               | 0.62             | 0.55              |
| <b>Factor 2: auditory food cue responsiveness</b>           |                    |                  |                   |
| My child gets excited by the sound of food cooking.         | 0.49               | 0.47             | 0.53              |
| My child wants to eat if he/she hears a snack being opened. | 0.62               | 0.56             | 0.71              |
| My child wants to eat when people talk about food.          | 0.43               | 0.44             | 0.43              |
| <i>Correlation between factors 1 and 2</i>                  | 0.47               | 0.46             | 0.52              |

*Note:* Item responses are anchored on a four-point Likert scale: rarely (1), sometimes (2), often (3) or a lot (4). The final score is the average score across seven items, ranging from 1 to 4. Higher scores indicate more responsiveness to external food cues.

**Table S6.** Distribution of participant demographics between the baseline and test-retest sample.

|                                        | <b>Full Sample<br/>(N = 185)</b> | <b>Test-Retest Sample<br/>(N = 96)</b> |          |
|----------------------------------------|----------------------------------|----------------------------------------|----------|
|                                        | <i>Mean ± SD or N (%)</i>        |                                        | <i>p</i> |
| <b>Child age (years)</b>               | 10.90 ± 1.19                     | 10.90 ± 1.21                           | 0.97     |
| <b>Child sex (N = 184)</b>             |                                  |                                        | 0.61     |
| Male                                   | 107 (58%)                        | 59 (61%)                               |          |
| Female                                 | 77 (42%)                         | 36 (38%)                               |          |
| <b>Child race/ethnicity</b>            |                                  |                                        | 0.28     |
| White, non-Hispanic                    | 167 (90%)                        | 91 (95%)                               |          |
| Others                                 | 18 (10%)                         | 5 (5%)                                 |          |
| <b>Child BMI-z (N = 184)</b>           | 0.48 ± 1.00                      | 0.44 ± 1.02                            | 0.73     |
| With overweight                        | 27 (14%)                         | 13 (14%)                               |          |
| With obesity                           | 30 (16%)                         | 16 (17%)                               |          |
| <b>Child media use (hours per day)</b> | 2.59 ± 1.72                      | 2.59 ± 1.79                            | 0.99     |
| <1                                     | 31 (17%)                         | 16 (17%)                               |          |
| ≥1 and <2                              | 44 (24%)                         | 24 (25%)                               |          |
| ≥ 2 and <3                             | 46 (25%)                         | 24 (25%)                               |          |
| ≥ 3 and <4                             | 40 (22%)                         | 18 (19%)                               |          |
| 4 and above                            | 24 (13%)                         | 14 (15%)                               |          |
| <b>Household annual income (\$)</b>    |                                  |                                        | 0.76     |
| <65,000                                | 24 (13%)                         | 9 (9%)                                 |          |
| 65,000-145,000                         | 99 (54%)                         | 51 (53%)                               |          |
| 145,000-225,000                        | 44 (24%)                         | 24 (25%)                               |          |
| Over 225,000                           | 18 (9%)                          | 12 (13%)                               |          |
| <b>Parental education</b>              |                                  |                                        | 0.59     |
| Without a bachelor's degree            | 30 (16%)                         | 14 (15%)                               |          |
| Bachelor's degree                      | 51 (28%)                         | 22 (23%)                               |          |
| Professional or graduate school        | 104 (56%)                        | 60 (63%)                               |          |

*Note:* SD, standard deviation. BMI-z, age- and sex-adjusted body mass index z-score based on the 2000 CDC growth charts. Child sex was not reported for one participant. Media use was missing for one participant and was imputed with the sample mean. Anthropometry was missing for one participant and was imputed with the sample mean. Household income had eight missing values and was imputed with the mode (i.e., \$145,000-225,000). Parental education had one missing value and was imputed with the sample mode (i.e., professional or graduate school). *P*-values were derived from Welch's two-sample *t*-tests and Pearson's Chi-squared tests.

**Table S7.** One-year test-retest reliability of the External Food Cue Responsiveness scale (N = 96).

|                                                                                                                                                                                                                                                                                                                                                                                                             | <b>EFCR-6, Mean (SD)</b> |                           |            |               |                 |
|-------------------------------------------------------------------------------------------------------------------------------------------------------------------------------------------------------------------------------------------------------------------------------------------------------------------------------------------------------------------------------------------------------------|--------------------------|---------------------------|------------|---------------|-----------------|
|                                                                                                                                                                                                                                                                                                                                                                                                             | <b>Baseline</b>          | <b>One-Year Follow-Up</b> | <b>ICC</b> | <b>95% CI</b> | <b><i>p</i></b> |
| EFCR-6                                                                                                                                                                                                                                                                                                                                                                                                      | 1.90 (0.53)              | 1.88 (0.65)               | 0.74       | 0.61, 0.83    | < 0.00001       |
| EFCR-visual                                                                                                                                                                                                                                                                                                                                                                                                 | 1.92 (0.70)              | 1.90 (0.82)               | 0.69       | 0.53, 0.79    | < 0.00001       |
| EFCR-auditory                                                                                                                                                                                                                                                                                                                                                                                               | 1.88 (0.59)              | 1.86 (0.65)               | 0.79       | 0.69, 0.86    | < 0.00001       |
| EFCR original                                                                                                                                                                                                                                                                                                                                                                                               | 1.87 (0.48)              | 1.87 (0.57)               | 0.76       | 0.64, 0.84    | < 0.00001       |
| <i>Note:</i> ICC, average score intraclass correlation computed via a two-way consistency model. EFCR-6, the six-item External Food Cue Responsiveness scale (range: 1 to 4). EFCR-visual, visual food cue responsiveness subscale (3 items). EFCR-auditory, auditory food cue responsiveness subscale (3 items). EFCR, the original External Food Cue Responsiveness scale (9 items, score range: 1 to 4). |                          |                           |            |               |                 |

**Table S8.** Association between obesity-related genetic risk scores and external food cue responsiveness, adjusting for child ancestry (N = 178).

| Dependent Variable | Independent Variable:<br>The 97 SNP PRS |             |               |             | Independent Variable:<br>The 265 SNP Pediatric-Specific PRS |             |               |             | Independent Variable:<br>The ~ 2 million SNP PRS |             |               |             |
|--------------------|-----------------------------------------|-------------|---------------|-------------|-------------------------------------------------------------|-------------|---------------|-------------|--------------------------------------------------|-------------|---------------|-------------|
|                    | Unadjusted                              |             | Adjusted      |             | Unadjusted                                                  |             | Adjusted      |             | Unadjusted                                       |             | Adjusted      |             |
|                    | $\beta_{std}$                           | 95% CI      | $\beta_{std}$ | 95% CI      | $\beta_{std}$                                               | 95% CI      | $\beta_{std}$ | 95% CI      | $\beta_{std}$                                    | 95% CI      | $\beta_{std}$ | 95% CI      |
| EFCR-6             | -0.04                                   | -0.18, 0.11 | -0.03         | -0.18, 0.12 | 0.10                                                        | -0.05, 0.25 | 0.10          | -0.05, 0.25 | 0.03                                             | -0.12, 0.18 | 0.01          | -0.15, 0.17 |
| EFCR-visual        | -0.07                                   | -0.21, 0.08 | -0.07         | -0.22, 0.08 | -0.03                                                       | -0.18, 0.12 | -0.03         | -0.18, 0.12 | -0.04                                            | -0.19, 0.11 | -0.04         | -0.20, 0.12 |
| EFCR-auditory      | 0.01                                    | -0.14, 0.16 | 0.02          | -0.13, 0.17 | 0.21                                                        | 0.07, 0.36  | 0.21          | 0.07, 0.36  | 0.09                                             | -0.05, 0.24 | 0.07          | -0.09, 0.22 |

*Note:* EFCR-6: the six-item External Food Cue Responsiveness scale. EFCR-visual, visual food cue responsiveness subscale. EFCR-auditory, auditory food cue responsiveness subscale. SNP: single nucleotide polymorphisms. PRS: polygenic risk score. CI: confidence interval. This table presents the standardized beta coefficients and 95% confidence intervals from linear regressions with each obesity genetic risk scores as the independent variable and EFCR-6 scores or subscale scores as the dependent variable, adjusting for European ancestry. European ancestry was determined by genetic data.



**Table S9.** Adjusted associations between the six-item External Food Cue Responsiveness scale (EFCR-6) subscale scores and correlates of EFCR in pre-adolescents (N=185).

|                      | Dependent Variable  |       |                 |       |                      |     |                     |       |                     |     |                      |     |                 |     |                |     |                        |     |                                    |       |
|----------------------|---------------------|-------|-----------------|-------|----------------------|-----|---------------------|-------|---------------------|-----|----------------------|-----|-----------------|-----|----------------|-----|------------------------|-----|------------------------------------|-------|
|                      | Trait impulsiveness |       | Child media use |       | Instrumental feeding |     | Restrictive feeding |       | Demanding parenting |     | Responsive parenting |     | Household chaos |     | The 97 SNP PRS |     | The ~2 million SNP PRS |     | The 266 SNP pediatric-specific PRS |       |
|                      | $\beta_s$           | $p$   | $\beta_s$       | $p$   | $\beta_s$            | $p$ | $\beta_s$           | $p$   | $\beta_s$           | $p$ | $\beta_s$            | $p$ | $\beta_s$       | $p$ | $\beta_s$      | $p$ | $\beta_s$              | $p$ | $\beta_s$                          | $p$   |
| <b>EFCR-visual</b>   | .28                 | <.001 | .25             | <.001 | .18                  | .02 | .32                 | <.001 | -.15                | .06 | -.19                 | .01 | .07             | .36 | -.08           | .33 | -.08                   | .32 | -.12                               | .13   |
| <b>EFCR-auditory</b> | -.13                | .09   | -.04            | .62   | -.01                 | .94 | .17                 | .02   | -.02                | .80 | .03                  | .73 | .22             | .01 | .04            | .63 | .12                    | .13 | .26                                | <.001 |

*Note:* EFCR-6: the six-item External Food Cue Responsiveness scale. EFCR-visual, visual food cue responsiveness subscale. EFCR-auditory, auditory food cue responsiveness subscale. SNP: single nucleotide polymorphisms. PRS: polygenic risk scores (N = 178). This table presents the standardized beta coefficients from linear regression with each correlate of EFCR as the dependent variable and the EFCR-6 subscales as the independent variables. Trait impulsiveness was assessed via Eysenck's Impulsivity Inventory (N = 184). Child media use was collected via parental reports (N = 184). Feeding practices were assessed via the Comprehensive Feeding Practices Questionnaire. Parenting style was evaluated via the Authoritative Parenting Index. Household chaos was assessed via the Confusion, Hubbub, and Order Scale (CHAOS, N = 184).
